# Supplementary material
Source: bioRxiv or medRxiv preprint supplement (https://www.biorxiv.org/highwire/filestream/2256/field_highwire_adjunct_files/30/008862-6.pdf)

Endoderm

Mesoderm

Ectoderm

C40210

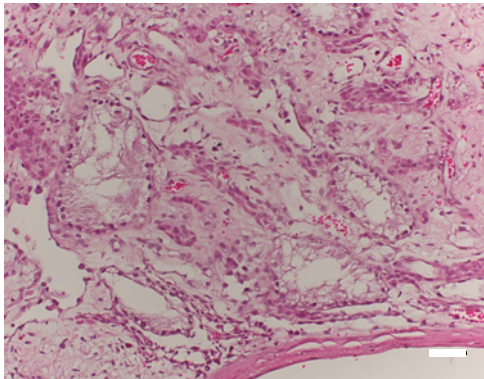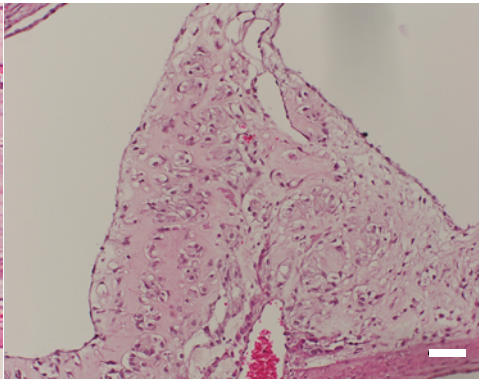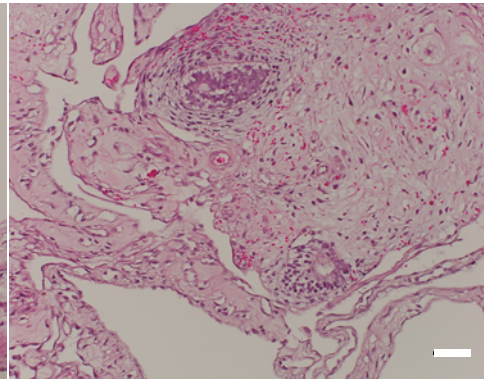

C3649

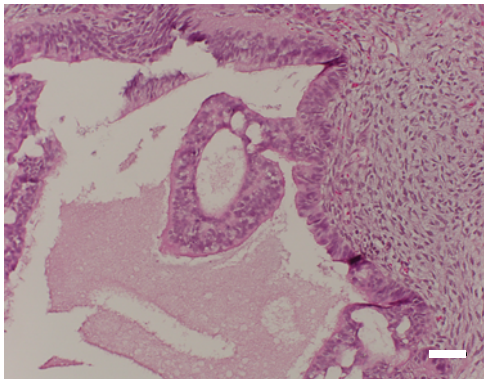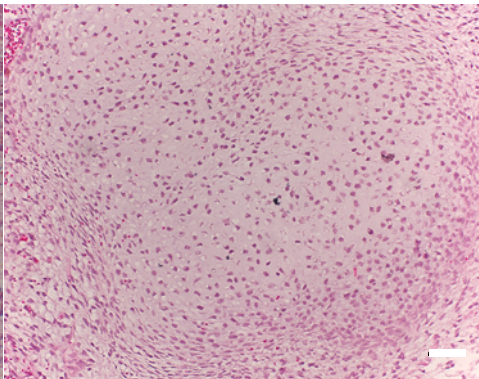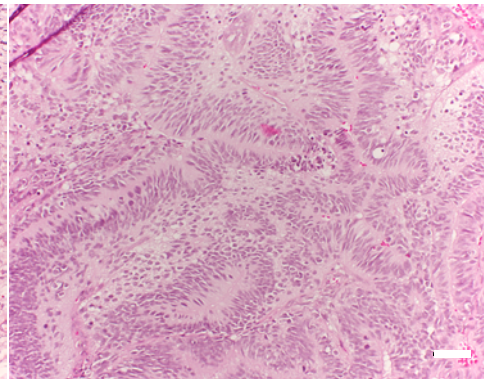

C8661

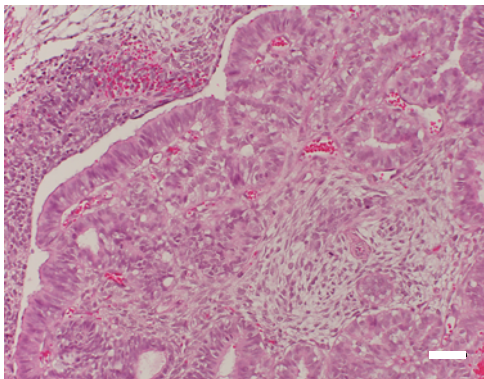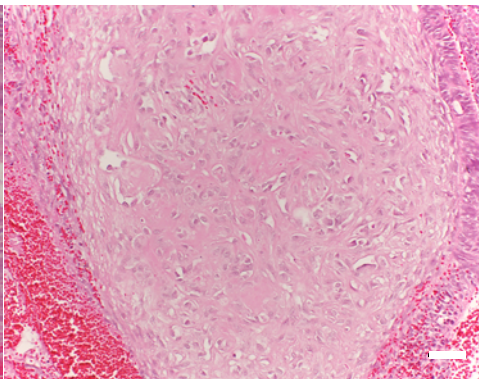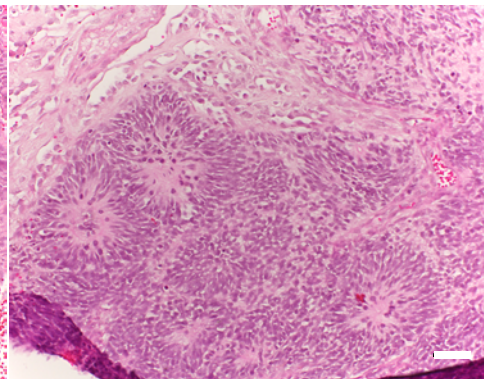

Supplement: Supplementary file [file 008862-6.pdf]
